# Supplementary material for: Focalization Performance Study of a Novel Bulk Acoustic Wave Device
Source: MDPI journal article supplement (doi:10.3390/nano11102630), 2021-10-06
Supplement: s1 [file s1]

# Supplementary Information

## Focalization Performance Study of a Novel Bulk Acoustic Wave Device

Federica Barbaresco <sup>1,2,\*</sup>, Luisa Racca <sup>2</sup>, Luca Spigarelli <sup>2</sup>, Matteo Cocuzza <sup>1,3</sup>, Simone Luigi Marasso <sup>1,3</sup>, Candido Fabrizio Pirri <sup>1,2</sup> and Giancarlo Canavese <sup>1,2,\*</sup>

<sup>1</sup> Chilab—Materials and Microsystems Laboratory, DISAT, Politecnico di Torino, Chivasso, 10034 Turin, Italy; matteo.cocuzza@infm.polito.it (M.C.); simone.marasso@polito.it (S.L.M.); fabrizio.pirri@polito.it (C.F.P.)

<sup>2</sup> Department of Applied Science and Technology, Politecnico di Torino, Corso Duca degli Abruzzi 24, 10129 Turin, Italy; luisa.racca@polito.it (L.R.); luca.spigarelli@polito.it (L.S.)

<sup>3</sup> CNR-IMEM, Parco Area delle Scienze, 37a, 43124 Parma, Italy

\* Correspondence: federica.barbaresco@polito.it (F.B.); giancarlo.canavese@polito.it (G.C.)

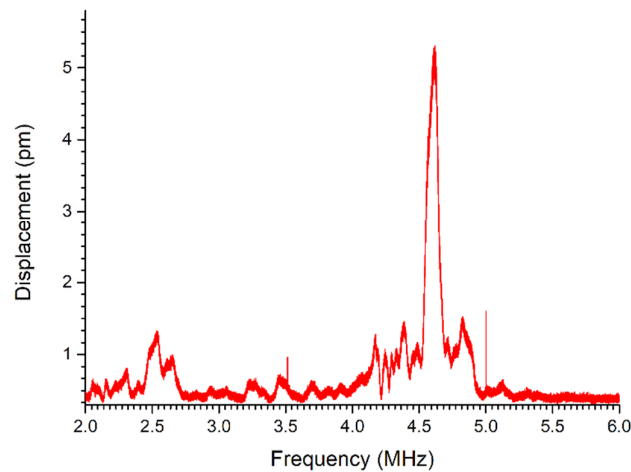

**Figure S1.** Measurement of the displacement of the piezoelectric element performed throughout the laser-Doppler vibrometer.

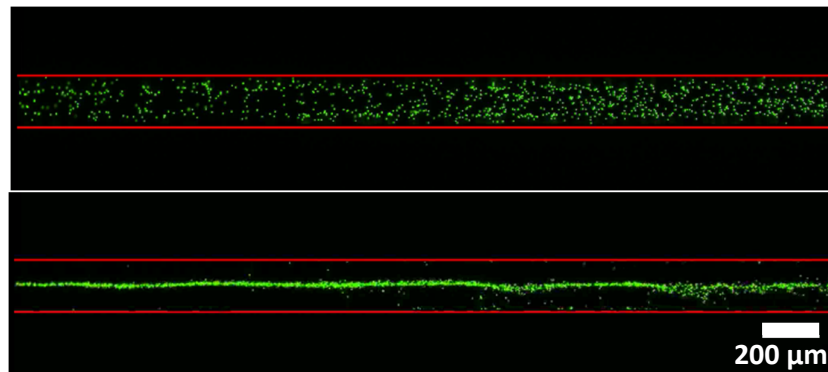

**Figure S2.** Frame of time-lapse acquired during the acoustophoretic test for the research of the exact resonance frequency of the BAW device. 4MPs concentrated at  $5.68 \times 10^6$  particles/mL are stable in water dispersion inside the microfluidic channel. (a) Ultrasound off and (b) Ultrasound on. Images acquired with 4x objective lens with an exposure time of 9.8 ms.

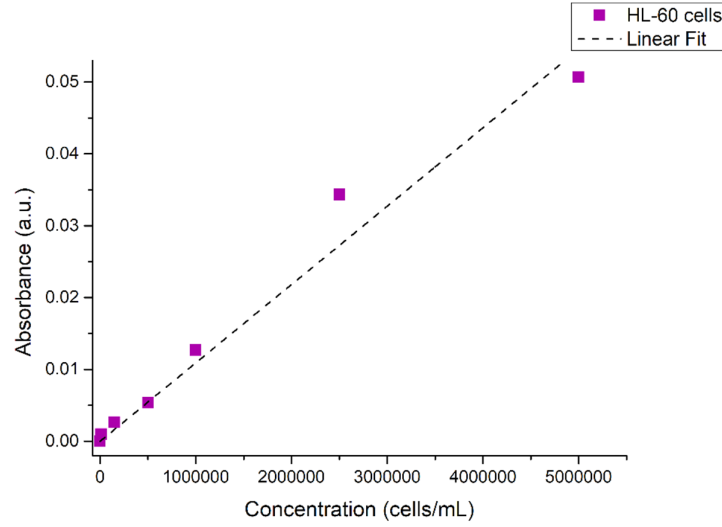

**Figure S3.** Calibration curve of HL-60 cells with regression equation  $y = 1.09 \times 10^{-8}x$ .

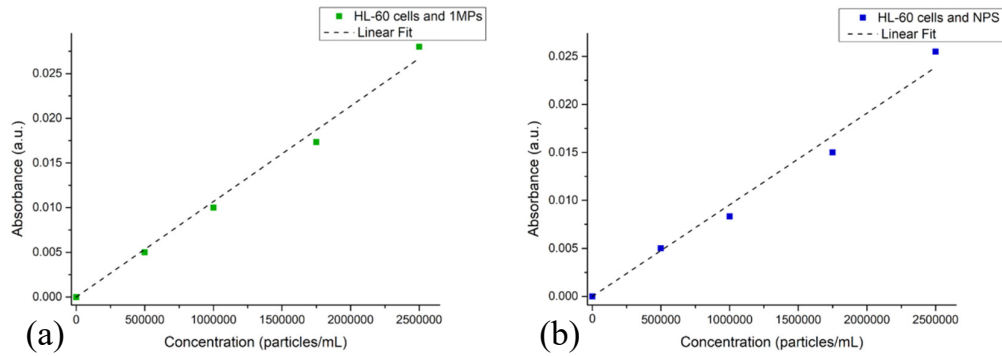

**Figure S4.** Calibration curves: (a) HL-60 cells and 1MPs (1:1) with regression equation  $y = 1.07 \times 10^{-8}x$  and (b) HL-60 cells and NPs (1:1) with regression equation  $y = 9.55 \times 10^{-9}x$ .

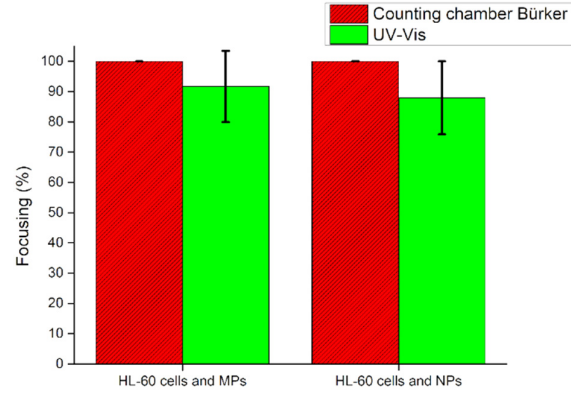

**Figure S5.** Focusing performance of the BAW device from Bürker counting chamber analysis and UV-Vis characterization: HL-60 cells concentrated at  $2.5 \times 10^6$  cells/mL mixed with 1MPs concentrated at  $2.5 \times 10^5$  particles/mL and HL-60 cells concentrated at  $2.5 \times 10^6$  cells/mL mixed with NPs concentrated at  $1.8 \times 10^5$  particles/mL. Mixed populations are injected at  $3 \mu\text{L}/\text{min}$  when  $50.59 V_{pp}$  is applied to the transducer and the device is actuated at its resonance frequency of 4.623 MHz.
